# Supplementary material for: The Mutation Hotspots at UGT1A Locus May Be Associated with Gilbert’s Syndrome Affecting the Taiwanese Population
Source: MDPI journal article supplement (doi:10.3390/ijms232012709), 2022-10-21
Supplement: s1 [file s1]

**Table S1.** 57 SNPs whose allele frequency variations have a significant difference between Gilbert's Syndrome and Healthy Control (p<0.05)

| SNP        | Chromosome | Position (bp) | p-value  | Location                                     |
|------------|------------|---------------|----------|----------------------------------------------|
| rs1976391  | 2          | 233757337     | 6.66E-15 | UGT1A region : Non Coding Transcript Variant |
| rs6431625  | 2          | 233729266     | 1.99E-12 | UGT1A3 : Missense Variant                    |
| rs1983023  | 2          | 233728376     | 8E-11    | UGT1A region : Non Coding Transcript Variant |
| rs11692021 | 2          | 233682559     | 5.39E-08 | UGT1A7 : Missense Variant                    |
| rs7586110  | 2          | 233681881     | 1.95E-07 | UGT1A region : Non Coding Transcript Variant |
| rs10168416 | 2          | 233688441     | 1.95E-07 | UGT1A region : Non Coding Transcript Variant |
| rs2070959  | 2          | 233693545     | 1.95E-07 | UGT1A6 : Missense Variant                    |
| rs4261716  | 2          | 233684471     | 1.33E-06 | UGT1A region : Non Coding Transcript Variant |
| rs4148323  | 2          | 233760498     | 1.51E-06 | UGT1A1 : Missense Variant                    |
| rs1105880  | 2          | 233693319     | 1.93E-06 | UGT1A region : Non Coding Transcript Variant |
| rs1105879  | 2          | 233693556     | 1.93E-06 | UGT1A6 : Missense Variant                    |
| rs6759892  | 2          | 233693023     | 1.93E-06 | UGT1A6 : Missense Variant                    |
| rs6506901  | 18         | 31233604      | 4.17E-06 | LOC105372049 : Intron Variant                |
| rs13103746 | 4          | 133198613     | 0.000143 | PCDH10 : Intron Variant                      |
| rs6710960  | 2          | 74732928      | 0.00019  | LOC102724497 : Intron Variant                |
| rs10236324 | 7          | 82746808      | 0.000298 | intergenic                                   |
| rs12685739 | 9          | 110016181     | 0.000299 | PALM2AKAP2 : Intron Variant                  |
| rs72549262 | 3          | 187235126     | 0.000398 | MASP1: Intron Variant                        |
| rs2741047  | 2          | 233673008     | 0.000456 | UGT1A region : Non Coding Transcript Variant |
| rs2741048  | 2          | 233673102     | 0.000474 | UGT1A region : Non Coding Transcript Variant |
| rs10082670 | 11         | 80616789      | 0.000502 | intergenic                                   |
| rs4526739  | 11         | 92931854      | 0.000512 | intergenic                                   |
| rs77359010 | 12         | 131226370     | 0.000527 | intergenic                                   |
| rs1875263  | 2          | 233716976     | 0.000759 | UGT1A region : Non Coding Transcript Variant |
| rs9390757  | 6          | 101540637     | 0.000774 | GRIK2 : Intron Variant                       |
| rs10025824 | 4          | 89860387      | 0.000969 | intergenic                                   |
| rs7329085  | 13         | 68120560      | 0.001194 | intergenic                                   |
| rs2717417  | 12         | 70635651      | 0.001251 | PTPRB : Intron Variant                       |
| rs7250003  | 19         | 56664116      | 0.001477 | ZNF835 : Synonymous Variant                  |
| rs501296   | 6          | 165199622     | 0.001712 | intergenic                                   |
| rs3919995  | 9          | 106675687     | 0.001918 | LINC01505 : Intron Variant                   |
| rs45625338 | 2          | 233729259     | 0.002294 | UGT1A3 : Missense Variant                    |
| rs17863787 | 2          | 233702448     | 0.00245  | UGT1A region : Non Coding Transcript Variant |
| rs7574296  | 2          | 233729603     | 0.002707 | UGT1A3 : Synonymous Variant                  |
| rs3755319  | 2          | 233758936     | 0.003032 | UGT1A region : Non Coding Transcript Variant |

|             |    |           |          |                                              |
|-------------|----|-----------|----------|----------------------------------------------|
| rs2221198   | 2  | 233749977 | 0.00333  | UGT1A region : Non Coding Transcript Variant |
| rs2560407   | 16 | 24090861  | 0.003647 | PRKCB : Intron Variant                       |
| rs2790054   | 1  | 165813205 | 0.004117 | intergenic                                   |
| rs145442045 | 8  | 31399504  | 0.004784 | LOC101929492 : Intron Variant                |
| rs2790057   | 1  | 165817074 | 0.005094 | intergenic                                   |
| rs4124874   | 2  | 233757013 | 0.005114 | UGT1A region : Non Coding Transcript Variant |
| rs247898    | 16 | 84441603  | 0.006235 | ATP2C2 : Intron Variant                      |
| rs34498969  | 16 | 11519017  | 0.006864 | LOC400499 : Intron Variant                   |
| rs2168395   | 2  | 33514230  | 0.008341 | RASGRP3 : Intron Variant                     |
| rs2850056   | 21 | 35960022  | 0.008868 | LOC101928269 : Intron Variant                |
| rs7337910   | 13 | 106460650 | 0.008969 | intergenic                                   |
| rs62160698  | 2  | 111433700 | 0.009475 | MIR4435-2HG : Intron Variant                 |
| rs3821242   | 2  | 233729157 | 0.012728 | UGT1A3 : Missense Variant                    |
| rs9982976   | 21 | 15062902  | 0.01443  | NRIP1 : Intron Variant                       |
| rs6706232   | 2  | 233729207 | 0.015249 | UGT1A3 : Missense Variant                    |
| rs3806596   | 2  | 233729061 | 0.015292 | UGT1A region : Non Coding Transcript Variant |
| rs12983058  | 19 | 51139527  | 0.015459 | SIGLEC9 : 3 Prime UTR Variant                |
| rs12627317  | 21 | 35385120  | 0.018206 | LOC100506403 : Intron Variant                |
| rs116955810 | 2  | 233702369 | 0.019163 | UGT1A region : Non Coding Transcript Variant |
| rs10180984  | 2  | 82196724  | 0.02127  | intergenic                                   |
| rs3806597   | 2  | 233728923 | 0.026915 | UGT1A region : Non Coding Transcript Variant |
| rs2008595   | 2  | 233728546 | 0.026915 | UGT1A region : Non Coding Transcript Variant |

---
